# Supplementary material for: Q RadFusion: Hybrid Quantum Classical Radiogenomic Framework for Breast Cancer Diagnosis
Source: Research Square preprint supplement (doi:10.21203/rs.3.rs-7657076/v1), 2025-09-23
Supplement: Supplementary file 1 [file fac6545d28281d9f5b8c7ac9.docx]

***Highlights***

- Q RadFusion: a hybrid quantum-classical framework for breast cancer diagnosis
- Integrates CBIS-DDSM mammography with TCGA-BRCA genomic profiles
- Uses QAOA, VQC, ResNet, and Transformer for multimodal fusion
- Achieves superior accuracy (94%) and AUC (0.96) over deep learning baselines
- Ensures reproducibility with public datasets and pseudocode methodology. Introduction
